# Supplementary material for: Seasonality of Plasmodium falciparum transmission: a systematic review
Source: Springer Nature journal article supplement (doi:10.1186/s12936-015-0849-2), 2015-09-15
Supplement: MOESM1 [file 9761568]

Number of studies by location and metric.

|                                     | Mosquito Abundance | Incidence | EIR | Prevalence | Other | Total |
|-------------------------------------|--------------------|-----------|-----|------------|-------|-------|
| Regions of Africa                   |                    |           |     |            |       |       |
| Africa                              | 0                  | 1         | 0   | 0          | 4     | 5     |
| African Highlands                   | 1                  | 2         | 0   | 0          | 0     | 2     |
| Central Africa                      | 0                  | 0         | 0   | 1          | 0     | 1     |
| Sub-saharan Africa                  | 0                  | 0         | 1   | 0          | 1     | 2     |
| West Africa                         | 0                  | 2         | 0   | 2          | 0     | 4     |
| Specific Countries in Africa        |                    |           |     |            |       |       |
| Benin                               | 1                  | 0         | 1   | 1          | 1     | 4     |
| Botswana                            | 0                  | 3         | 0   | 0          | 0     | 3     |
| Burkina Faso                        | 1                  | 1         | 0   | 2          | 2     | 6     |
| Burundi                             | 0                  | 3         | 0   | 0          | 0     | 3     |
| Cameroon                            | 0                  | 1         | 0   | 0          | 0     | 1     |
| Eritrea                             | 0                  | 2         | 0   | 1          | 0     | 3     |
| Ethiopia                            | 0                  | 6         | 0   | 0          | 1     | 7     |
| Gambia                              | 1                  | 0         | 0   | 1          | 0     | 2     |
| Ghana                               | 2                  | 1         | 0   | 1          | 2     | 5     |
| Guinea-Bissau                       | 1                  | 0         | 0   | 0          | 0     | 1     |
| Ivory Coast                         | 0                  | 0         | 0   | 1          | 1     | 2     |
| Kenya                               | 4                  | 6         | 3   | 1          | 5     | 17    |
| Liberia                             | 0                  | 0         | 0   | 1          | 0     | 1     |
| Madagascar                          | 0                  | 0         | 0   | 1          | 0     | 1     |
| Malawi                              | 0                  | 1         | 0   | 0          | 2     | 3     |
| Mali                                | 2                  | 1         | 0   | 2          | 0     | 5     |
| Mozambique                          | 0                  | 3         | 0   | 0          | 1     | 4     |
| Niger                               | 3                  | 0         | 0   | 0          | 1     | 4     |
| Nigeria                             | 1                  | 1         | 0   | 0          | 1     | 3     |
| Senegal                             | 1                  | 0         | 0   | 2          | 1     | 4     |
| Sierra Leone                        | 1                  | 0         | 0   | 1          | 0     | 2     |
| South Africa                        | 0                  | 4         | 0   | 0          | 0     | 4     |
| Sudan                               | 1                  | 3         | 0   | 1          | 0     | 5     |
| Tanzania                            | 3                  | 3         | 1   | 2          | 2     | 10    |
| Togo                                | 1                  | 0         | 0   | 1          | 0     | 2     |
| Zimbabwe                            | 0                  | 2         | 0   | 0          | 0     | 2     |
| Regions of Asia                     |                    |           |     |            |       |       |
| East Asia                           | 0                  | 0         | 0   | 0          | 1     | 1     |
| South Asia                          | 0                  | 0         | 0   | 0          | 1     | 1     |
| Specific Countries in Asia          |                    |           |     |            |       |       |
| Bangladesh                          | 2                  | 2         | 0   | 0          | 0     | 4     |
| China                               | 0                  | 7         | 0   | 0          | 1     | 8     |
| India                               | 0                  | 4         | 0   | 0          | 0     | 4     |
| Iran                                | 0                  | 1         | 0   | 0          | 1     | 2     |
| South Korea                         | 0                  | 1         | 0   | 0          | 1     | 2     |
| Sri Lanka                           | 0                  | 2         | 0   | 0          | 0     | 2     |
| Thailand                            | 1                  | 1         | 0   | 0          | 1     | 3     |
| Vietnam                             | 0                  | 1         | 0   | 0          | 0     | 1     |
| Specific Countries of Europe        |                    |           |     |            |       |       |
| Poland                              | 0                  | 0         | 0   | 0          | 1     | 1     |
| Portugal                            | 1                  | 0         | 0   | 0          | 0     | 1     |
| Specific Countries in South America |                    |           |     |            |       |       |
| Brazil                              | 1                  | 2         | 0   | 0          | 2     | 5     |
| Colombia                            | 0                  | 2         | 0   | 0          | 0     | 3     |
| Honduras                            | 0                  | 1         | 0   | 0          | 0     | 1     |
| Nicaragua                           | 0                  | 1         | 0   | 0          | 0     | 1     |
| Paraguay                            | 0                  | 1         | 0   | 0          | 0     | 1     |
| Total                               | 29                 | 72        | 6   | 22         | 34    | 159   |
