# Supplementary material for: Seasonality of Plasmodium falciparum transmission: a systematic review
Source: Springer Nature journal article supplement (doi:10.1186/s12936-015-0849-2), 2015-09-15
Supplement: MOESM2 [file 9761568]

Number of studies by climate driver and metric (minimum and maximum significant lag identified in brackets).

|                    | Mosquito Abundance | Incidence | EIR     | Prevalence | Other | Total |
|--------------------|--------------------|-----------|---------|------------|-------|-------|
| Rainfall           | 4 [1-2]            | 37 [0-6]  | 2 [1-2] | 4 [0-0]    | 8     | 54    |
| Temperature        | 20 [0-1]           | 36 [0-9]  | 4 [0-1] | 4 [0-2]    | 5     | 64    |
| Vegetation Indices | 4 [0-0]            | 9 [0-3]   | 2 [0-0] | 3 [0-1]    | 1     | 18    |
| Other              | 3                  | 18        | 2       | 2          | 1     | 24    |
| Total              | 29                 | 72        | 6       | 22         | 34    | 159   |
