# Supplementary material for: Seasonality of Plasmodium falciparum transmission: a systematic review
Source: Springer Nature journal article supplement (doi:10.1186/s12936-015-0849-2), 2015-09-15
Supplement: MOESM3 [file 9761568]

Number of studies by modeling approach and metric.

|             | Mosquito Abundance | Incidence | EIR | Prevalence | Other | Total |
|-------------|--------------------|-----------|-----|------------|-------|-------|
| Statistical | 23                 | 58        | 5   | 22         | 20    | 125   |
| Mechanistic | 6                  | 18        | 1   | 2          | 5     | 31    |
| Other       | 0                  | 0         | 0   | 0          | 8     | 8     |
| Total       | 29                 | 72        | 6   | 22         | 34    | 159   |
