# Supplementary material for: Seasonality of Plasmodium falciparum transmission: a systematic review
Source: Springer Nature journal article supplement (doi:10.1186/s12936-015-0849-2), 2015-09-15
Supplement: MOESM4 [file 9761568]

Number of statistical studies by metric.

|                         | Mosquito Abundance | Incidence | EIR | Prevalence | Other | Total |
|-------------------------|--------------------|-----------|-----|------------|-------|-------|
| Simple                  | 4                  | 12        | 1   | 2          | 6     | 22    |
| Regression              | 14                 | 23        | 1   | 3          | 9     | 50    |
| Spatial and/or Bayesian | 4                  | 9         | 1   | 14         | 4     | 31    |
| Total                   | 29                 | 72        | 6   | 22         | 34    | 159   |
