# Supplementary material for: Seasonality of Plasmodium falciparum transmission: a systematic review
Source: Springer Nature journal article supplement (doi:10.1186/s12936-015-0849-2), 2015-09-15
Supplement: MOESM5 [file 9761568]

Number of studies by modeling approach and driver.

|             | Rainfall | Temperature | Vegetation Indices | Other | Total |
|-------------|----------|-------------|--------------------|-------|-------|
| Statistical | 51       | 56          | 18                 | 24    | 125   |
| Mechanistic | 7        | 12          | 2                  | 0     | 31    |
| Other       | 0        | 0           | 0                  | 0     | 8     |
| Total       | 54       | 64          | 18                 | 24    | 159   |
