# Supplementary material for: Seasonality of Plasmodium falciparum transmission: a systematic review
Source: Springer Nature journal article supplement (doi:10.1186/s12936-015-0849-2), 2015-09-15
Supplement: MOESM6 [file 9761568]

Number of statistical studies by driver.

|                         | Rainfall | Temperature | Vegetation Indices | Other | Total |
|-------------------------|----------|-------------|--------------------|-------|-------|
| Simple                  | 8        | 6           | 3                  | 1     | 22    |
| Regression              | 18       | 25          | 7                  | 8     | 50    |
| Spatial and/or Bayesian | 15       | 15          | 6                  | 7     | 31    |
| Total                   | 41       | 46          | 16                 | 16    | 103   |
