# Supplementary material for: Seasonality of Plasmodium falciparum transmission: a systematic review
Source: Springer Nature journal article supplement (doi:10.1186/s12936-015-0849-2), 2015-09-15
Supplement: MOESM7 [file 9761568]

Number of studies by location and climate driver.

|                                     | Rainfall | Temperature | Vegetation Indices | Other | Total |
|-------------------------------------|----------|-------------|--------------------|-------|-------|
| Regions of Africa                   |          |             |                    |       |       |
| Africa                              | 3        | 3           | 0                  | 1     | 5     |
| African Highlands                   | 1        | 2           | 0                  | 0     | 2     |
| Central Africa                      | 1        | 1           | 1                  | 0     | 1     |
| Sub-saharan Africa                  | 0        | 1           | 0                  | 1     | 2     |
| West Africa                         | 2        | 2           | 2                  | 1     | 4     |
| Specific Countries in Africa        |          |             |                    |       |       |
| Benin                               | 1        | 2           | 1                  | 0     | 4     |
| Botswana                            | 2        | 1           | 0                  | 0     | 3     |
| Burkina Faso                        | 1        | 2           | 0                  | 0     | 6     |
| Burundi                             | 2        | 2           | 0                  | 0     | 3     |
| Cameroon                            | 1        | 1           | 0                  | 0     | 1     |
| Eritrea                             | 2        | 1           | 2                  | 1     | 3     |
| Ethiopia                            | 5        | 5           | 1                  | 1     | 7     |
| Gambia                              | 0        | 1           | 0                  | 0     | 2     |
| Ghana                               | 0        | 2           | 0                  | 0     | 5     |
| Guinea-Bissau                       | 0        | 1           | 0                  | 0     | 1     |
| Ivory Coast                         | 0        | 0           | 0                  | 0     | 2     |
| Kenya                               | 5        | 5           | 2                  | 3     | 17    |
| Liberia                             | 0        | 0           | 0                  | 0     | 1     |
| Madagascar                          | 0        | 0           | 0                  | 0     | 1     |
| Malawi                              | 3        | 0           | 0                  | 0     | 3     |
| Mali                                | 1        | 2           | 2                  | 0     | 5     |
| Mozambique                          | 0        | 2           | 0                  | 3     | 4     |
| Niger                               | 0        | 1           | 0                  | 0     | 4     |
| Nigeria                             | 0        | 1           | 0                  | 1     | 3     |
| Senegal                             | 0        | 1           | 0                  | 0     | 4     |
| Sierra Leone                        | 0        | 1           | 0                  | 0     | 2     |
| South Africa                        | 1        | 1           | 0                  | 0     | 4     |
| Sudan                               | 2        | 1           | 1                  | 1     | 5     |
| Tanzania                            | 4        | 2           | 0                  | 0     | 10    |
| Togo                                | 0        | 1           | 0                  | 0     | 2     |
| Zimbabwe                            | 2        | 2           | 1                  | 1     | 2     |
| Regions of Asia                     |          |             |                    |       |       |
| East Asia                           | 0        | 1           | 0                  | 0     | 1     |
| South Asia                          | 0        | 0           | 0                  | 0     | 1     |
| Specific Countries in Asia          |          |             |                    |       |       |
| Bangladesh                          | 1        | 1           | 3                  | 0     | 4     |
| China                               | 4        | 7           | 0                  | 4     | 8     |
| India                               | 2        | 0           | 1                  | 0     | 4     |
| Iran                                | 1        | 2           | 0                  | 2     | 2     |
| South Korea                         | 1        | 1           | 0                  | 1     | 2     |
| Sri Lanka                           | 2        | 0           | 0                  | 0     | 2     |
| Thailand                            | 2        | 2           | 0                  | 0     | 3     |
| Vietnam                             | 1        | 1           | 0                  | 1     | 1     |
| Specific Countries of Europe        |          |             |                    |       |       |
| Poland                              | 0        | 0           | 0                  | 0     | 1     |
| Portugal                            | 0        | 1           | 0                  | 0     | 1     |
| Specific Countries in South America |          |             |                    |       |       |
| Brazil                              | 1        | 0           | 0                  | 0     | 5     |
| Colombia                            | 0        | 1           | 0                  | 2     | 3     |
| Honduras                            | 0        | 0           | 0                  | 0     | 1     |
| Nicaragua                           | 0        | 0           | 0                  | 0     | 1     |
| Paraguay                            | 0        | 0           | 1                  | 0     | 1     |
| Total                               | 54       | 64          | 18                 | 24    | 159   |
