# Supplementary material for: Seasonality of Plasmodium falciparum transmission: a systematic review
Source: Springer Nature journal article supplement (doi:10.1186/s12936-015-0849-2), 2015-09-15
Supplement: MOESM9 [file 9761568]

Number of statistical studies by location.

|                                     | Simple | Regression | Spatial and/or Bayesian | Total |
|-------------------------------------|--------|------------|-------------------------|-------|
| Regions of Africa                   |        |            |                         |       |
| Africa                              | 0      | 1          | 1                       | 2     |
| African Highlands                   | 0      | 1          | 0                       | 1     |
| Central Africa                      | 0      | 0          | 1                       | 1     |
| Sub-saharan Africa                  | 0      | 1          | 0                       | 1     |
| West Africa                         | 0      | 0          | 2                       | 2     |
| Specific Countries in Africa        |        |            |                         |       |
| Benin                               | 0      | 2          | 1                       | 3     |
| Botswana                            | 0      | 0          | 0                       | 0     |
| Burkina Faso                        | 2      | 3          | 1                       | 6     |
| Burundi                             | 0      | 1          | 2                       | 3     |
| Cameroon                            | 0      | 0          | 0                       | 0     |
| Eritrea                             | 1      | 1          | 0                       | 2     |
| Ethiopia                            | 1      | 6          | 0                       | 7     |
| Gambia                              | 0      | 1          | 1                       | 2     |
| Ghana                               | 2      | 1          | 1                       | 4     |
| Guinea-Bissau                       | 0      | 1          | 0                       | 1     |
| Ivory Coast                         | 0      | 0          | 1                       | 1     |
| Kenya                               | 3      | 3          | 1                       | 7     |
| Liberia                             | 0      | 0          | 1                       | 1     |
| Madagascar                          | 0      | 0          | 0                       | 0     |
| Malawi                              | 0      | 2          | 1                       | 3     |
| Mali                                | 1      | 2          | 2                       | 5     |
| Mozambique                          | 1      | 0          | 3                       | 4     |
| Niger                               | 0      | 1          | 0                       | 1     |
| Nigeria                             | 0      | 1          | 0                       | 1     |
| Senegal                             | 1      | 1          | 1                       | 3     |
| Sierra Leone                        | 0      | 1          | 1                       | 2     |
| South Africa                        | 0      | 2          | 0                       | 2     |
| Sudan                               | 1      | 1          | 1                       | 3     |
| Tanzania                            | 2      | 4          | 1                       | 7     |
| Togo                                | 0      | 1          | 1                       | 2     |
| Zimbabwe                            | 0      | 0          | 1                       | 1     |
| Regions of Asia                     |        |            |                         |       |
| East Asia                           | 0      | 0          | 0                       | 0     |
| South Asia                          | 0      | 0          | 0                       | 0     |
| Specific Countries in Asia          |        |            |                         |       |
| Bangladesh                          | 0      | 3          | 1                       | 4     |
| China                               | 1      | 5          | 1                       | 7     |
| India                               | 3      | 0          | 0                       | 3     |
| Iran                                | 0      | 1          | 1                       | 2     |
| South Korea                         | 0      | 1          | 0                       | 1     |
| Sri Lanka                           | 1      | 0          | 1                       | 2     |
| Thailand                            | 1      | 0          | 0                       | 1     |
| Vietnam                             | 0      | 0          | 1                       | 1     |
| Specific Countries of Europe        |        |            |                         |       |
| Poland                              | 0      | 1          | 0                       | 1     |
| Portugal                            | 0      | 0          | 0                       | 0     |
| Specific Countries in South America |        |            |                         |       |
| Brazil                              | 1      | 0          | 1                       | 2     |
| Colombia                            | 0      | 1          | 0                       | 1     |
| Honduras                            | 0      | 0          | 0                       | 0     |
| Nicaragua                           | 0      | 0          | 0                       | 0     |
| Paraguay                            | 0      | 0          | 0                       | 0     |
| Total                               | 22     | 50         | 31                      | 103   |
