# Supplementary material for: Seasonality of Plasmodium falciparum transmission: a systematic review
Source: Springer Nature journal article supplement (doi:10.1186/s12936-015-0849-2), 2015-09-15
Supplement: MOESM10 [file 9761568]

Mean lag identified (standard error in parentheses) by location and climate driver for mosquito abundance.

|                              | Rainfall   | Temperature | Vegetation Indices |
|------------------------------|------------|-------------|--------------------|
| Regions of Africa            |            |             |                    |
| African Highlands            | -          | Mech.       | -                  |
| Specific Countries in Africa |            |             |                    |
| Benin                        | -          | 0 (NA)      | -                  |
| Burkina Faso                 | -          | 0 (NA)      | -                  |
| Gambia                       | -          | 0 (NA)      | -                  |
| Ghana                        | -          | 0 (0)       | -                  |
| Guinea-Bissau                | -          | 0 (NA)      | -                  |
| Kenya                        | 2 (NA)     | 0.33 (0.58) | 0 (NA)             |
| Mali                         | 1.5 (0.71) | 0 (0)       | 0 (NA)             |
| Niger                        | -          | 0 (NA)      | -                  |
| Nigeria                      | -          | 0 (NA)      | -                  |
| Senegal                      | -          | 0 (NA)      | -                  |
| Sierra Leone                 | -          | 0 (NA)      | -                  |
| Tanzania                     | 0 (NA)     | 0 (0)       | -                  |
| Togo                         | -          | 0 (NA)      | -                  |
| Specific Countries in Asia   |            |             |                    |
| Bangladesh                   | -          | -           | 0 (0)              |
| Thailand                     | 0 (NA)     | 0 (NA)      | -                  |
| Specific Countries of Europe |            |             |                    |
| Portugal                     | -          | 0 (NA)      | -                  |
