# Supplementary material for: Seasonality of Plasmodium falciparum transmission: a systematic review
Source: Springer Nature journal article supplement (doi:10.1186/s12936-015-0849-2), 2015-09-15
Supplement: MOESM11 [file 9761568]

Mean lag identified (standard error in parentheses) by location and climate driver for incidence.

|                                     | Rainfall    | Temperature | Vegetation Indices |
|-------------------------------------|-------------|-------------|--------------------|
| Regions of Africa                   |             |             |                    |
| Africa                              | 3 (NA)      | 0 (NA)      | -                  |
| African Highlands                   | 1.5 (0.71)  | 3.5 (1.29)  | -                  |
| Specific Countries in Africa        |             |             |                    |
| Botswana                            | 2.25 (1.71) | 3 (1)       | -                  |
| Burkina Faso                        | 0 (NA)      | Mech.       | -                  |
| Burundi                             | 0 (0)       | 0 (0)       | -                  |
| Cameroon                            | 3 (1)       | NA (NA)     | -                  |
| Eritrea                             | 2.5 (0.58)  | -           | 0.33 (0.58)        |
| Ethiopia                            | 2.23 (0.86) | 1.96 (1.32) | 3 (NA)             |
| Ghana                               | -           | 0 (NA)      | -                  |
| Kenya                               | 2.89 (1.9)  | 0 (0)       | -                  |
| Malawi                              | 1 (NA)      | -           | -                  |
| Mali                                | -           | -           | 0.5 (NA)           |
| Mozambique                          | -           | 0 (0)       | -                  |
| South Africa                        | Mech.       | 5 (2.74)    | -                  |
| Sudan                               | 0.5 (0.71)  | 0 (NA)      | 2.5 (NA)           |
| Tanzania                            | 2 (NA)      | 0 (NA)      | -                  |
| Zimbabwe                            | 3 (1.41)    | 3 (1.41)    | 2 (NA)             |
| Specific Countries in Asia          |             |             |                    |
| Bangladesh                          | 0 (NA)      | 0 (NA)      | 1.5 (1.29)         |
| China                               | 1.67 (0.82) | 1.56 (1.13) | -                  |
| India                               | 1 (0)       | -           | 2 (1)              |
| Iran                                | -           | 1 (NA)      | -                  |
| South Korea                         | 2.5 (NA)    | 1.25 (0.71) | -                  |
| Sri Lanka                           | 1.5 (1.29)  | -           | -                  |
| Thailand                            | 0.5 (0.71)  | 0 (NA)      | -                  |
| Vietnam                             | 0 (NA)      | 0 (NA)      | -                  |
| Specific Countries in South America |             |             |                    |
| Brazil                              | 0 (NA)      | -           | -                  |
| Colombia                            | -           | Mech.       | -                  |
| Paraguay                            | -           | -           | 0 (NA)             |
