# Supplementary material for: Seasonality of Plasmodium falciparum transmission: a systematic review
Source: Springer Nature journal article supplement (doi:10.1186/s12936-015-0849-2), 2015-09-15
Supplement: MOESM12 [file 9761568]

Mean lag identified (standard error in parentheses) by location and climate driver for EIR.

|                              | Rainfall   | Temperature | Vegetation Indices |
|------------------------------|------------|-------------|--------------------|
| Regions of Africa            |            |             |                    |
| Sub-saharan Africa           | -          | 0 (NA)      | -                  |
| Specific Countries in Africa |            |             |                    |
| Benin                        | -          | Mech.       | -                  |
| Kenya                        | 1.5 (0.71) | 0.33 (0.58) | 0 (0)              |
