# Supplementary material for: Seasonality of Plasmodium falciparum transmission: a systematic review
Source: Springer Nature journal article supplement (doi:10.1186/s12936-015-0849-2), 2015-09-15
Supplement: MOESM13 [file 9761568]

Mean lag identified (standard error in parentheses) by location and climate driver for prevalence.

|                              | Rainfall | Temperature | Vegetation Indices |
|------------------------------|----------|-------------|--------------------|
| Regions of Africa            |          |             |                    |
| Central Africa               | 0 (NA)   | 1.5 (0.71)  | 1 (NA)             |
| West Africa                  | 0 (0)    | 1 (0.82)    | 0.5 (0.71)         |
| Specific Countries in Africa |          |             |                    |
| Eritrea                      | -        | 0 (NA)      | -                  |
| Tanzania                     | 2 (1)    | -           | -                  |
