# Supplementary material for: Seasonality of Plasmodium falciparum transmission: a systematic review
Source: Springer Nature journal article supplement (doi:10.1186/s12936-015-0849-2), 2015-09-15

Number of papers

- Simple
- Regression
- Spatial and/or Bayesian
- Mechanistic
- Both
- Other

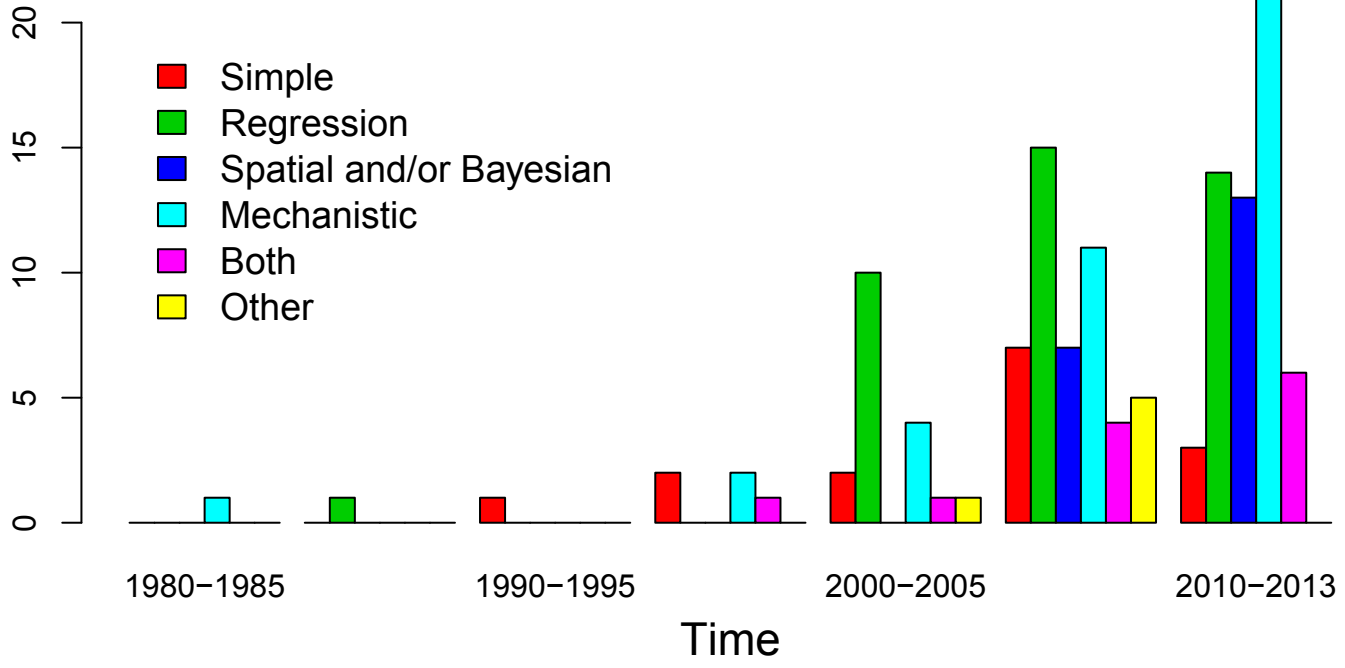

Supplement: MOESM16 [file 9761568]
