# Supplementary material for: Seasonality of Plasmodium falciparum transmission: a systematic review
Source: Springer Nature journal article supplement (doi:10.1186/s12936-015-0849-2), 2015-09-15
Supplement: MOESM17 [file 9761568]

# Global distribution of mechanistic models

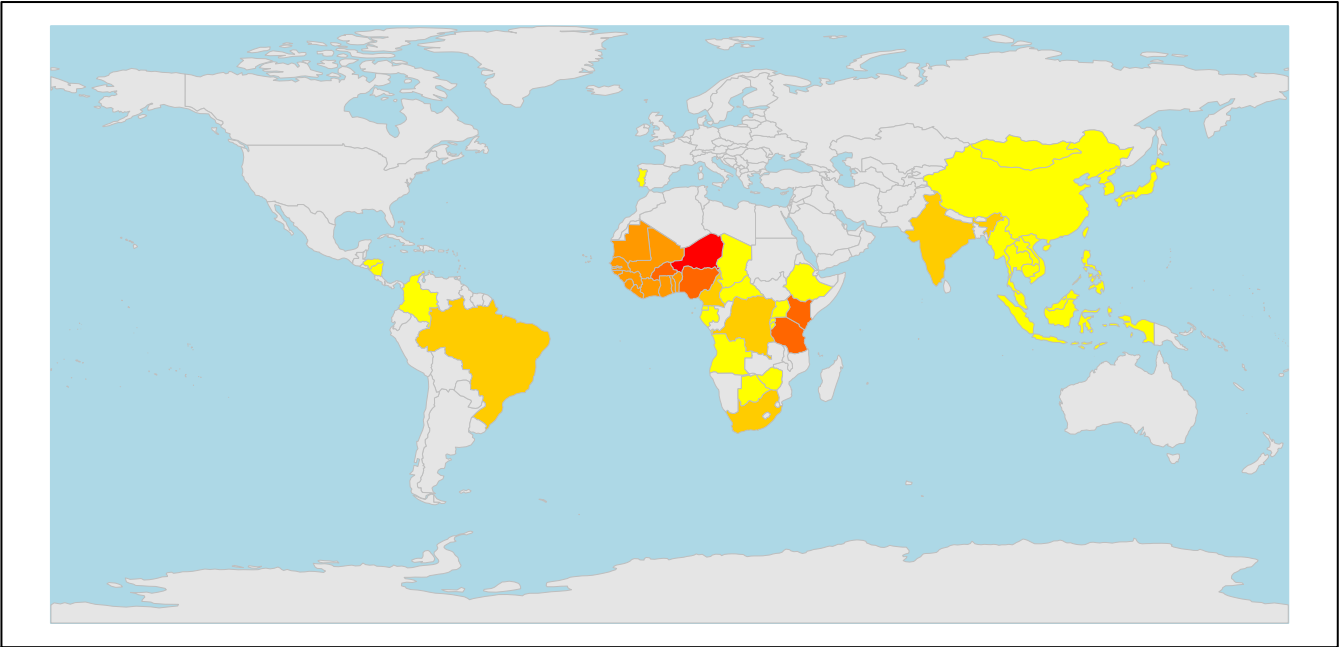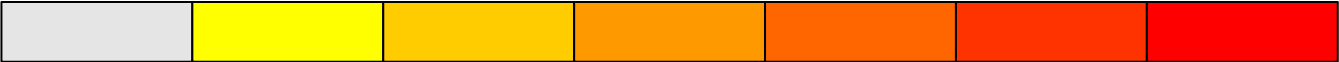

0

1

2

3

4

5

6
