# Supplementary material for: Seasonality of Plasmodium falciparum transmission: a systematic review
Source: Springer Nature journal article supplement (doi:10.1186/s12936-015-0849-2), 2015-09-15

**A** Global distribution of malaria papers using mosquito abundance as the response

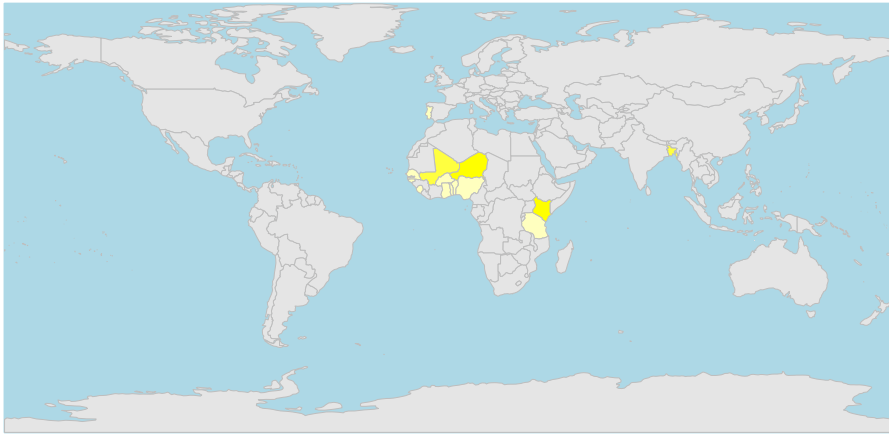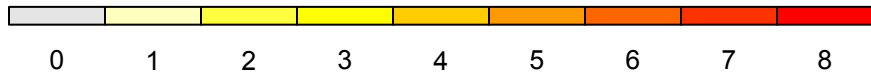

**B** Global distribution of malaria papers using incidence as the response

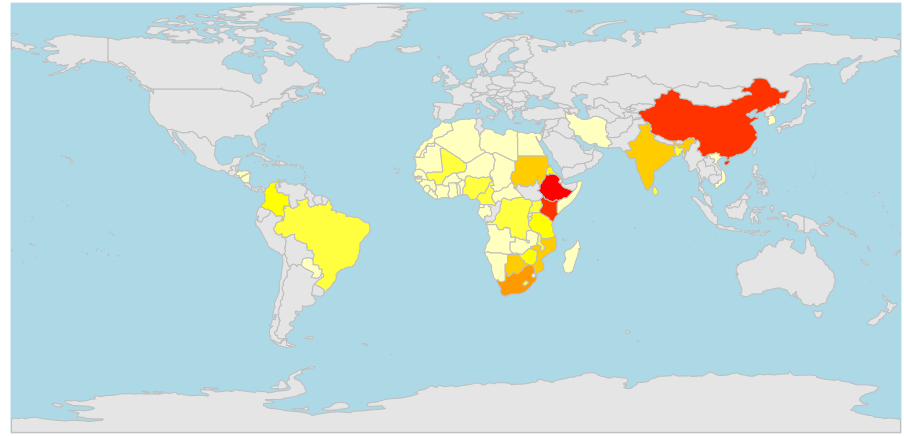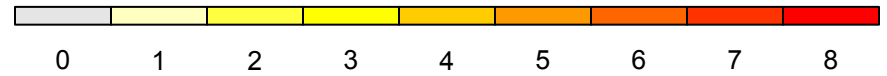

**C** Global distribution of malaria papers using EIR as the response

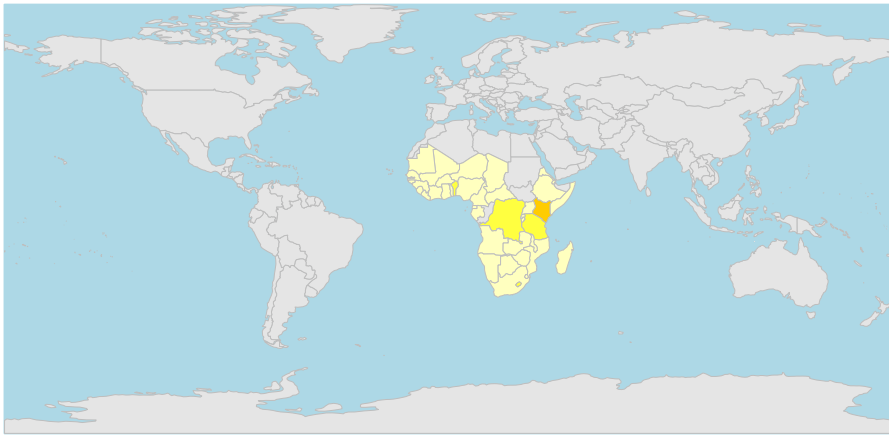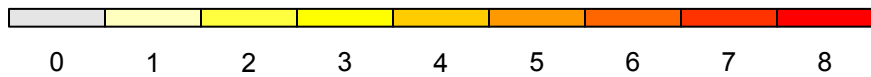

**D** Global distribution of malaria papers using prevalence as the response

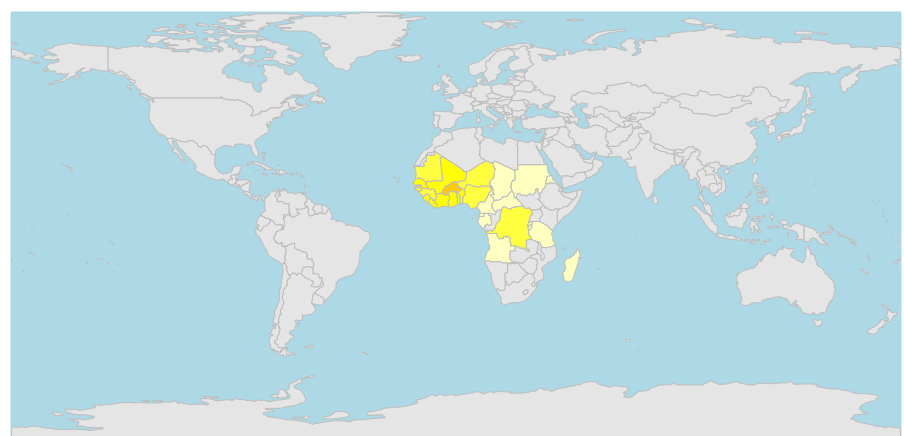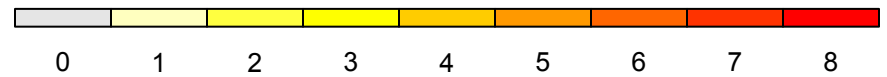

Supplement: MOESM18 [file 9761568]
